# Supplementary material for: Thermal hydrolysis of solid fraction reduces waste disposal and provides a substrate for anaerobic photobiological treatment of refinery wastewater
Source: Royal Society of Chemistry journal article supplement (doi:10.1039/d2ew00263a), 2023-01-01
Supplement: d2ew00263a1.pdf [file d2ew00263a1.pdf]

## **Supplementary Material**

### **Thermal hydrolysis of oily sludge reduces waste disposal and provides substrate to anaerobic photo-biological treatment of refinery wastewater**

**S. Jerez, J. San Martín, M. Ventura, M.I. Pariente, Y. Segura\*, D. Puyol, R. Molina, J.A. Melero, F. Martínez**

Department of Chemical and Environmental Technology. ESCET, University Rey Juan Carlos,  
28933, Madrid, Spain.

\*Corresponding author. E-mail address: yolanda.segura@urjc.es

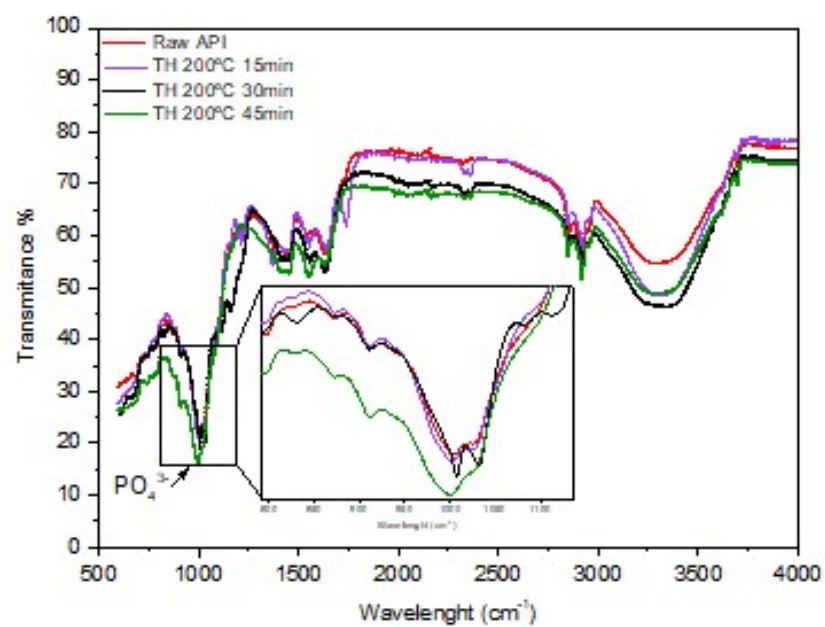

Figure S1: FTIR spectra of the solid fraction of the oily sludge before and after TH at 200°C.

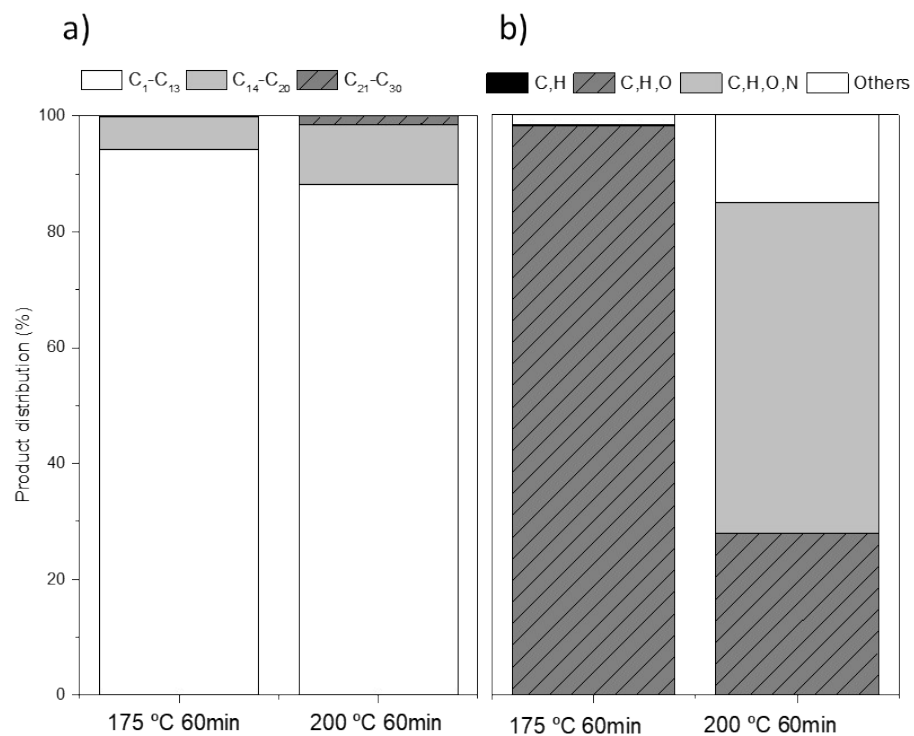

Figure S2: Hydrocarbon product distribution based on the number of carbon atoms (a) and components (b) in the aqueous of oily sludge, after TH at 175 and 200°C during 60 min.

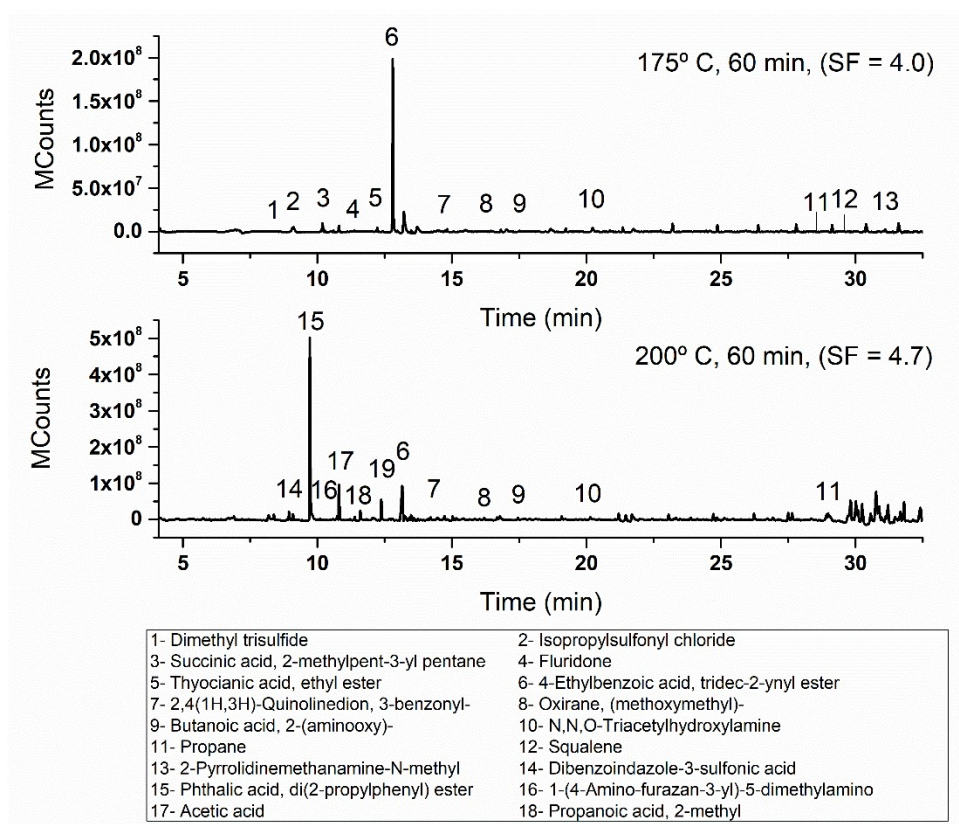

Figure S3: GC-MS chromatograph resulted from the analysis of the aqueous phase obtained at TH 175°C and 60min and 200°C and 60 min

Table S1. COD/N/P ratios of wastewater, the hydrolyzed fraction of thermal hydrolysis, and aqueous mediums of the photoanaerobic tests.

| RWW          | Hydrolyzed fraction of TH |              | RWW +<br>Hydrolyzed fraction of TH |
|--------------|---------------------------|--------------|------------------------------------|
|              | Conditions (°C-min)       | COD/N/P      | COD/N/P                            |
| 100/1.5/0.37 | 175- 15                   | 100/2.8/0.04 | 100/3.0/0.28                       |
|              | 175-30                    | 100/2.7/0.06 | 100/2.9/0.18                       |

|  |         |              |              |
|--|---------|--------------|--------------|
|  | 175-60  | 100/3.2/0.08 | 100/3.3/0.24 |
|  | 200- 15 | 100/4.8/0.13 | 100/4.5/0.31 |
|  | 200-30  | 100/4.6/0.09 | 100/4.4/0.30 |
|  | 200-60  | 100/4.1/0.06 | 100/4.0/0.33 |
